# Supplementary material for: NO2 Adsorption Sensitivity Adjustment of As/Sb Lateral Heterojunctions through Strain: First Principles Calculations
Source: MDPI journal article supplement (doi:10.3390/cryst13091325), 2023-08-30
Supplement: s1 [file s1]

## Supporting information

# NO<sub>2</sub> adsorption sensitivity adjustment of As/Sb lateral heterojunctions through strain: First principles calculations

Li Yang<sup>1</sup>, Dengkui Wang<sup>1,\*</sup>, Dan Fang<sup>1,\*</sup>, Hao Yan<sup>1</sup>, Yingjiao Zhai<sup>1</sup>, Xueying Chu<sup>1</sup>,  
Jinhua Li<sup>1</sup>, Xuan Fang<sup>1</sup>

1. State Key Laboratory of High Power Semiconductor Lasers, School of Physics, Changchun University of Science and Technology, 7089 Wei-Xing Road, Changchun 130022, PR China

\*Corresponding author: [wccwss@foxmail.com](mailto:wccwss@foxmail.com) [fangdan19822011@163.com](mailto:fangdan19822011@163.com)

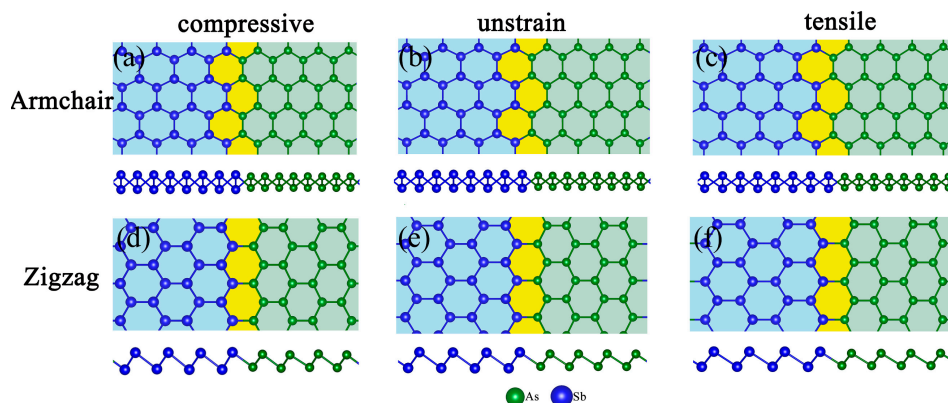

Figure S1. Top and side view of the As/Sb AC- LHS without adsorbed NO<sub>2</sub> under (a) compressive strain, (b) unstrained, and (c) tensile strain and that of the As/Sb ZZ-LHS adsorbed NO<sub>2</sub> under (d) compressive strain, (e) unstrained, and (f) tensile strain.

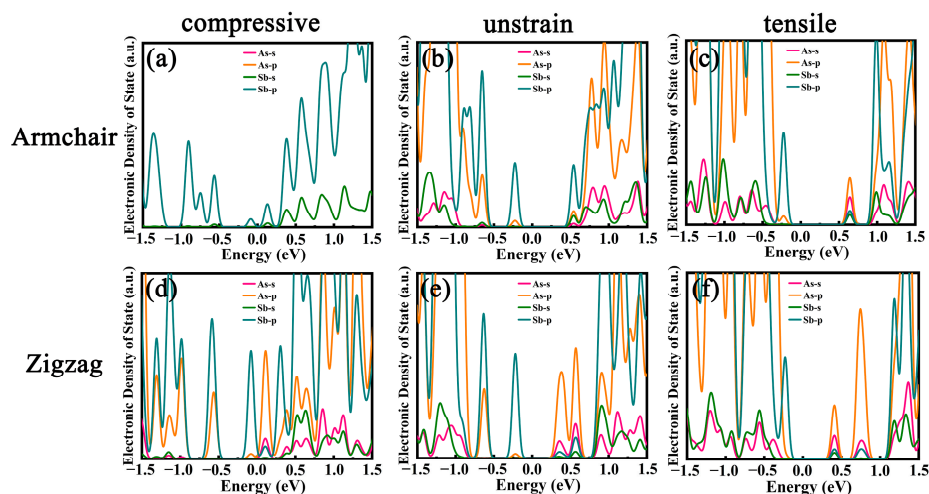

Figure S2. (a-c) PDOS of armchair As/Sb LHS without adsorbed NO<sub>2</sub> under (a) -4% compressive

strain, (b) unstrained (c) 4% tensile strain, (d-f) PDOS of zigzag As/Sb LHS without adsorbed NO<sub>2</sub> under (d) - 4% compressive strain (e) unstrained (f) 4% tensile strain.
