# Supplementary material for: NO2 Adsorption Sensitivity Adjustment of As/Sb Lateral Heterojunctions through Strain: First Principles Calculations
Source: MDPI journal article supplement (doi:10.3390/cryst13091325), 2023-08-30
Supplement: s1 [file s1]

Archive with 1 entries (1 files):
- crystals-2558005-supplementary.pdf
